# Supplementary material for: Rice oil as a green source of capping ligands for GdF3 nanocrystals
Source: Royal Society of Chemistry journal article supplement (doi:10.1039/c6nj01052k), 2016-01-01
Supplement: c6nj01052k1.pdf [file c6nj01052k1.pdf]

Electronic Supplementary Information (ESI) for New Journal of Chemistry

**Rice oil as a green source of capping ligands for GdF<sub>3</sub> nanocrystals**

Mateusz Banski,\* Agnieszka Noculak, Jan Misiewicz, Artur Podhorodecki

*Department of Experimental Physics, Wrocław University of Technology, Wybrzeże  
Wyspińskiego 27, 50-370 Wrocław, Poland*

\*mateusz.banski@pwr.edu.pl

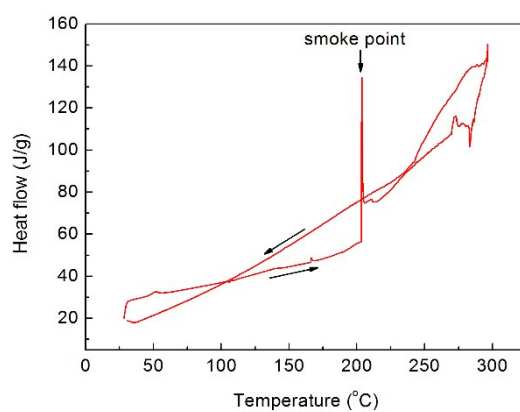

**Figure S1.** DSC spectrum of glyceryl trioleate.

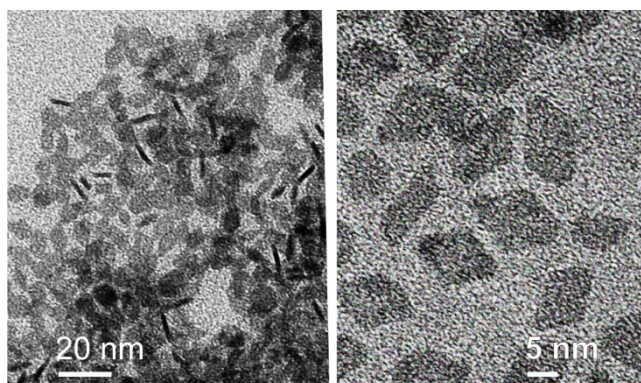

**Figure S2.** TEM images of rhombic GdF<sub>3</sub> NCs after 120 minutes of synthesis at 340°C.

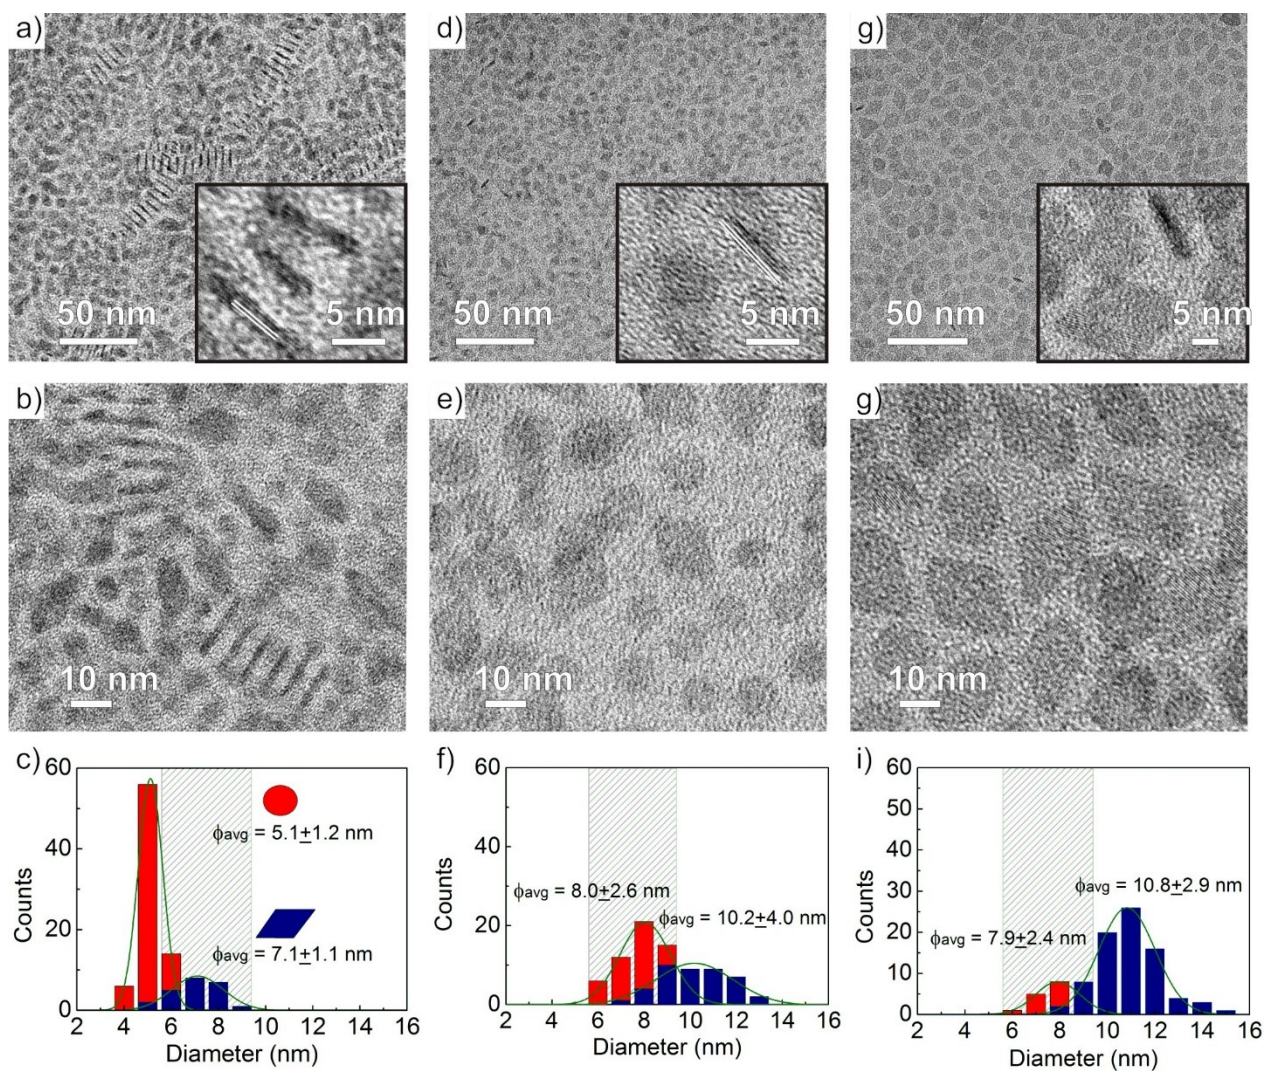

**Figure S3.** TEM images and size distribution histograms of GdF<sub>3</sub> NCs growth for 60 minutes in 255°C (a, b, c), 295°C (d, e, f) and 340°C (g, h, i). (diameter of spherical NCs - red; edge length of rhombic NCs - blue).

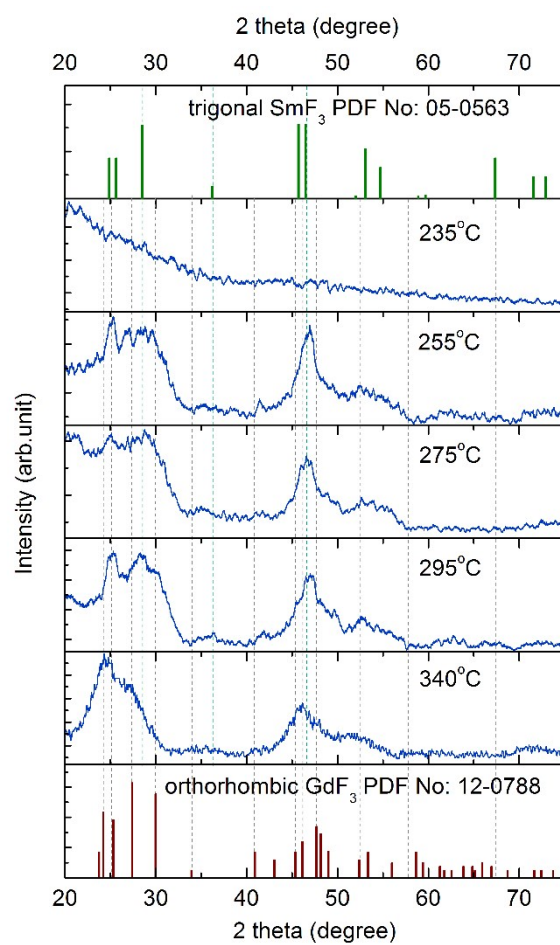

**Figure S4.** XRD spectra of GdF<sub>3</sub> NCs synthesized at various synthesis temperature for the 60 minutes. The diffraction peaks positions of orthorhombic GdF<sub>3</sub> (PDF: no 12-0788) and trigonal SmF<sub>3</sub> (PDF no: 05-0563) are shown for reference.

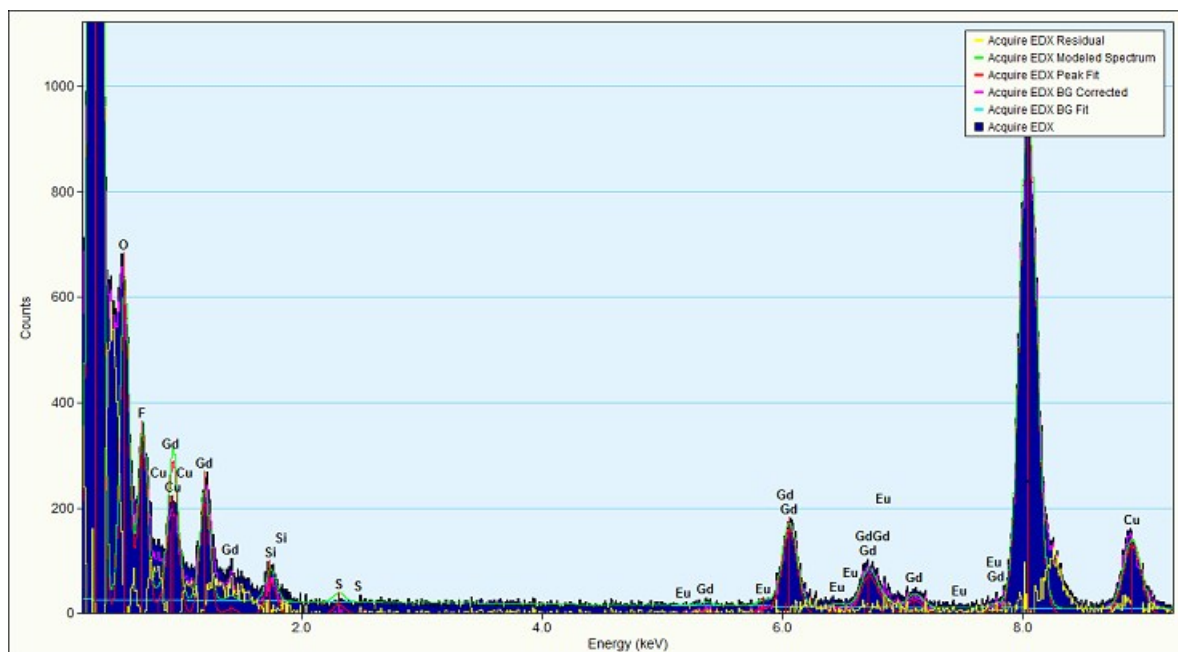

**Figure S5.** EDX spectrum of  $\text{Eu}^{3+}$  doped  $\text{GdF}_3$  nanocrystals. The determined dopant concentration is  $\sim 6\%$ .
